# Supplementary material for: Axitinib versus placebo as an adjuvant treatment of renal cell carcinoma: results from the phase III, randomized ATLAS trial
Source: PubMed Central journal article supplement — Ann Oncol. 2018 Oct 20;29(12):2371–8. doi: 10.1093/annonc/mdy454 (PMC6311952; doi:10.1093/annonc/mdy454), 2018-10-20
Supplement: mdy454_figures1.pdf [file mdy454_figures1.pdf]

**Supplementary Figure S1. Patient disposition (CONSORT diagram).**

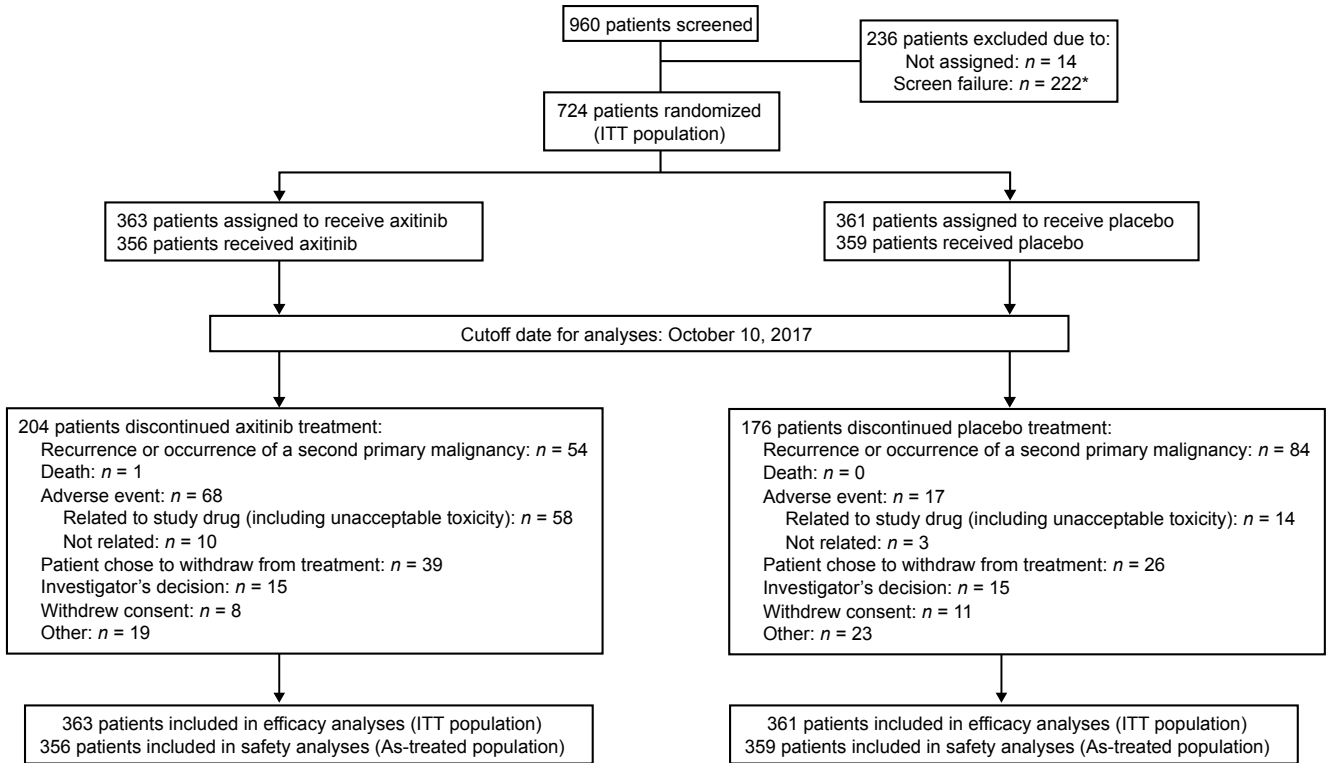

\*The most common reasons were evidence of macroscopic residual disease or metastatic disease, and not having adequate organ function.

As-treated population, all patients who received at least one dose of study drug as reported in patient diaries. ITT population, intent-to-treat population includes all patients who were randomized, regardless of whether they received study drug.
